# Supplementary material
Source: MDPI journal article supplement (https://www.mdpi.com/2073-4344/14/2/129)
Supplement: s1 [file s1]

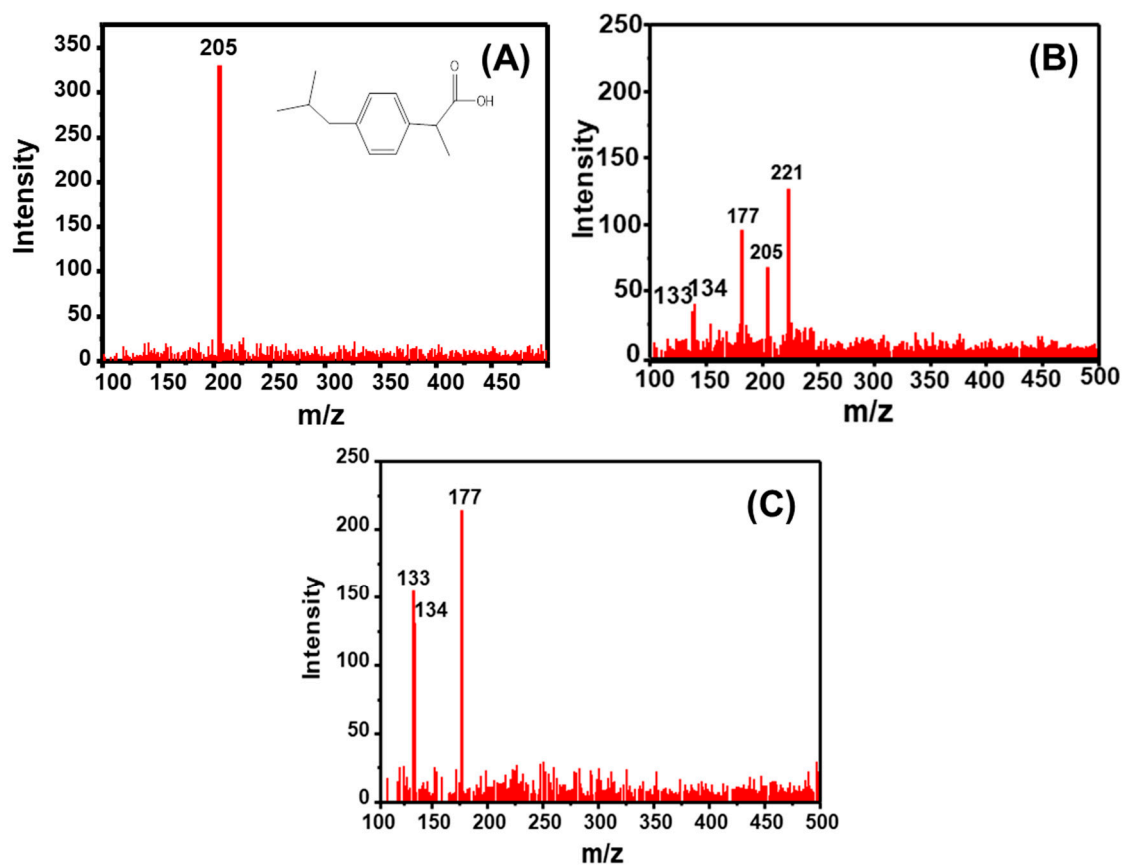

**Figure S1.** HPLC-MS spectra of the starting IBU drug (A) and its photo-oxidized intermediate products (B and C)

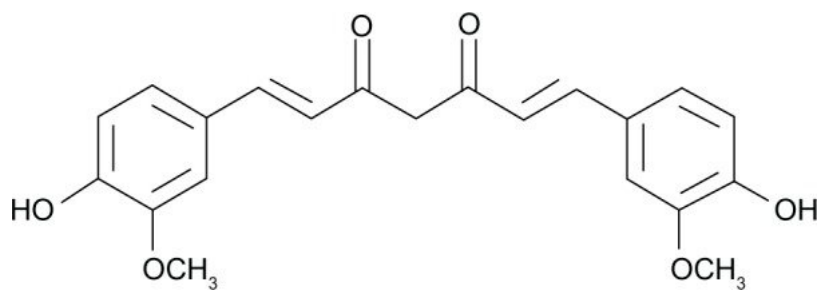

**Figure S2.** The chemical structure of curcumin
